# Supplementary material
Source: ML conference proceedings conference paper supplement (https://proceedings.neurips.cc/paper_files/paper/2022/hash/7eed2822411dc37b3768ae04561caafa-Abstract.html)
Supplement: Supplementary file 1 [file 7eed2822411dc37b3768ae04561caafa-Supplemental-Conference.pdf]

## 530 **A Experimental setup**

531 We describe the kernels under comparison, their parameters and the used datasets. All experiments  
532 were performed on an Intel Xeon E5-2690v4 machine at 2.6GHz with 384 GB of RAM.

### 533 **A.1 Kernels**

534 As a baseline we included the *node label kernel* (VL) and *edge label kernel* (EL), which are the dot  
535 products on node and edge label histograms, respectively, see [40, 25]. For the Weisfeiler-Leman  
536 subtree kernel (WL), the  $\ell$ -step random walk kernel (RW) and the node-centric  $\ell$ -walk kernel (NCW)  
537 and its variant with WL expressiveness (NCWWL) we chose the iteration number and walk length  
538 from  $\{0, \dots, 5\}$  by cross-validation. For RW,  $\lambda_i = 1$  for  $i \in \{0, \dots, \ell\}$  was used. For NCW and  
539 NCWWL, we selected  $\alpha$  from  $\{0.01, 0.1, 1, 1000\}$  and  $\beta$  from  $\{0, 0.5, 1\}$ . We have not included  
540 extensions of the WL such as [23, 41], which could also be applied similarly to the node-centric  $\ell$ -walk  
541 graph kernel. In addition we used a *graphlet kernel* (GL3) and the shortest-path kernel (SP) [4]. GL3 is  
542 based on connected subgraphs with three nodes taking labels into account similar to the approach used  
543 by Shervashidze et al. [39]. For SP we used the Dirac kernel to compare path lengths. We implemented  
544 the node-centric  $\ell$ -walk graph kernel as well as all baselines in Java.<sup>1</sup> We performed classification  
545 experiments with the  $C$ -SVM implementation LIBSVM [6]. We report mean prediction accuracies and  
546 standard deviations obtained by 10-fold nested cross-validation repeated 10 times with random fold  
547 assignment. Within each fold all necessary parameters were selected by cross-validation based on the  
548 training set. This includes the regularization parameter  $C$  and kernel parameters.

### 549 **A.2 Datasets**

550 We tested on widely-used graph classification benchmarks datasets of the TUDATSETS repository [31]  
551 representing graphs from different domains. MUTAG, NCI1, NCI109 and PTC-FM represent small  
552 molecules, ENZYMES and PROTEINS are derived from macromolecules, and COLLAB and IMDBBIN  
553 are social networks. The datasets define binary graph classification experiments with exception of  
554 ENZYMES and COLLAB, which are divided into six and three classes, respectively. All graphs have  
555 node labels with exception of the social network graphs. We removed edge labels, if present, since they  
556 are not supported by all graph kernel implementations.

---

<sup>1</sup>Our code is publicly available at <http://anonymized>.
